# Supplementary material
Source: PubMed Central journal article supplement (PMC3403466)
Supplement: pro0021-0686-SD1.pdf [file pro0021-0686-SD1.pdf]

## *Supporting Information*

# Formyl-coenzyme A (CoA):oxalate CoA-transferase from the acidophile *Acetobacter aceti* has a distinctive electrostatic surface and inherent acid stability

Elwood A. Mullins,<sup>1,2</sup> Courtney M. Starks,<sup>2</sup> Julie A. Francois,<sup>2</sup>  
Lee Sael,<sup>3,4</sup> Daisuke Kihara<sup>3,4</sup> & T. Joseph Kappock\*<sup>1</sup>

<sup>1</sup> Department of Biochemistry, Purdue University

<sup>2</sup> Department of Chemistry, Washington University in St. Louis

<sup>3</sup> Department of Biological Sciences, Purdue University

<sup>4</sup> Department of Computer Science, Purdue University

\***Corresponding author** T. Joseph Kappock

Dept. Biochemistry, Purdue U., 175 S. University St., West Lafayette, IN 47907

telephone: (765) 494-8383; fax: (765) 494-1897; email: kappock@purdue.edu

**Running title:** Structure of *A. aceti* UctB

## List of Tables

|    |                                                                 |   |
|----|-----------------------------------------------------------------|---|
| I  | Comparison of selected FCOCT · CoA crystal structures . . . . . | 3 |
| II | Differential analysis of selected surface residues . . . . .    | 4 |

## List of Figures

|    |                                                                 |    |
|----|-----------------------------------------------------------------|----|
| 1  | HPLC time series used for FCOCT activity measurements . . . . . | 5  |
| 2  | Saturation curve for formyl-CoA . . . . .                       | 6  |
| 3  | Saturation curve for oxalate . . . . .                          | 6  |
| 4  | Ultraviolet CD spectra for H6UctB . . . . .                     | 7  |
| 5  | Thermal denaturation profiles for H6UctB . . . . .              | 7  |
| 6  | Ultraviolet CD spectra for H6YfdW . . . . .                     | 8  |
| 7  | Thermal denaturation profiles for H6YfdW . . . . .              | 8  |
| 8  | Topology diagram for H6UctB . . . . .                           | 9  |
| 9  | Structure-based sequence alignment of FCOCT enzymes . . . . .   | 10 |
| 10 | Locations of surface charge alterations–H6UctB . . . . .        | 11 |
| 11 | Locations of surface charge alterations–YfdW . . . . .          | 12 |
| 12 | Locations of surface charge alterations–FRC . . . . .           | 13 |
| 13 | Electrostatic surface of H6UctB . . . . .                       | 14 |
| 14 | Electrostatic surface of YfdW . . . . .                         | 15 |
| 15 | Electrostatic surface of FRC . . . . .                          | 16 |

Table I: Comparison of selected FCOCT · CoA crystal structures.

|                                                        | H6UctB<br>3ubm | YfdW<br>1q6y | FRC<br>1p5r |
|--------------------------------------------------------|----------------|--------------|-------------|
| Accessible surface area (Å <sup>2</sup> ) <sup>a</sup> | 31 746         | 29 968       | 31 039      |
| Non-polar (%)                                          | 48             | 52           | 48          |
| Polar (%)                                              | 36             | 36           | 36          |
| Charged (%)                                            | 15             | 12           | 15          |
| Positive N (%)                                         | 8.2            | 5.3          | 6.8         |
| Negative O (%)                                         | 7.2            | 7.0          | 8.6         |
| Packing <sup>b</sup>                                   |                |              |             |
| Expected/observed volume (%)                           | 91             | 97           | 98          |
| No. packing defects                                    | 304            | 152          | 145         |
| No. buried charges                                     | 32             | 32           | 36          |
| Hydrogen bonds <sup>c</sup>                            |                |              |             |
| Total no. (excluding solvent)                          | 460            | 449          | 442         |
| No. inter-subunit <sup>d</sup>                         |                |              |             |
| All contacts                                           | 51             | 56           | 55          |
| Contacts involving side chains                         | 41             | 44           | 45          |
| Buried residue pairs                                   | 10             | 16           | 12          |
| No. intra-subunit <sup>e</sup>                         |                |              |             |
| All contacts                                           | 409            | 393          | 387         |
| Contacts involving side chains                         | 163            | 153          | 141         |
| Buried residue pairs                                   | 41             | 41           | 44          |
| Salt bridges <sup>f</sup>                              |                |              |             |
| No. inter-subunit                                      |                |              |             |
| All residues                                           | 1              | 4            | 5           |
| Buried residue pairs                                   | 0              | 0            | 0           |
| No. intra-subunit                                      |                |              |             |
| All residues                                           | 33             | 38           | 36          |
| Buried residue pairs                                   | 7              | 6            | 2           |

<sup>a</sup> Values computed for the AB dimer using PyMOL.

<sup>b</sup> Values computed for the AB dimer using VADAR.

<sup>c</sup> Values computed for subunit A.

<sup>d</sup> Values computed using PDBSUM.

<sup>e</sup> Values computed using HBPLUS.

<sup>f</sup> Values determined for the AB dimer by manual inspection using a 3.5 Å cutoff.

Table II: Differential analysis of selected surface residues.<sup>a</sup>

| Entry | Residue |      |      | Category <sup>b</sup> |      |      | RSCASA <sup>c</sup> | Contacts <sup>d</sup> |                 |                 |
|-------|---------|------|------|-----------------------|------|------|---------------------|-----------------------|-----------------|-----------------|
|       | 3ubm    | 1q6y | 1p5r | 3ubm                  | 1q6y | 1p5r | (%)                 | 3ubm                  | 1q6y            | 1p5r            |
| 1     | A087    | E083 | E081 | S                     | -    | -    | 75.5                | sol                   | sol             | sol             |
| 2     | W095    | E091 | K089 | H                     | -    | +    | 17.2                | sol                   | sol             | SM              |
| 3     | Q120    | E116 | E114 | P                     | -    | -    | 84.2                | sol                   | sol             | sol             |
| 4     | S143    | K139 | K137 | P                     | +    | +    | 58.8                | sol                   | SS <sup>e</sup> | SL              |
| 5     | n176    | d159 | d157 | P                     | -    | -    | 24.7                | SS <sup>e</sup>       | sol             | sol             |
| 6     | d283    | p266 | a276 | -                     | S    | S    | 36.5                | SS <sup>e</sup>       | sol             | sol             |
| 7     | K313    | A296 | A306 | +                     | S    | S    | 65.3                | sol                   | sol             | sol             |
| 8     | T339    | D322 | D332 | P                     | -    | -    | 57.8                | sol                   | SS              | SM+SS           |
| 9     | H346    | Y329 | W339 | +                     | H    | H    | 28.9                | SM                    | SM              | SS <sup>f</sup> |
| 10    | K349    | Q332 | Q342 | +                     | P    | P    | 83.6                | sol                   | sol             | sol             |
| 11    | R351    | F333 | Y343 | +                     | H    | H    | 88.2                | sol                   | sol             | sol             |
| 12    | A366    | D349 | D359 | S                     | -    | -    | 26.1                | sol                   | SS              | SM              |
| 13    | D368    | S351 | S361 | -                     | P    | P    | 19.7                | sol                   | SS              | SM              |
| 14    | k382    | l365 | i375 | +                     | H    | H    | 65.7                | sol                   | sol             | sol             |
| 15    | Q409    | E393 | E403 | P                     | -    | -    | 56.6                | SM                    | SM              | SS              |
| 16    | a422    | d406 | d416 | S                     | -    | -    | 70.9                | sol                   | sol             | SS              |

<sup>a</sup> The residues listed are (1) surface accessible, (2) members of the same residue category in YfdW (1q6y) and FRC (1p5r) but are in a different residue category in H6UctB (3ubm), and (3) predicted to alter the surface charge (i.e., at least one of the categories is charged). Residues located at structurally conserved positions are shown in capital letters.

<sup>b</sup> Categories: + = positive (HRK); - = negative (DE); H = large/hydrophobic (FILMVW); P = polar (CN-QSTY); S = small (AGP). Entry 2 was obtained when charged residues were considered as a single category. Entries 9 and 11 were obtained when Tyr was grouped in the H set. Other changes to the groupings did not yield new entries.

<sup>c</sup> Relative side-chain accessible surface area in H6UctB, computed using NACCESS using default parameters derived from sidechain areas in Ala-X-Ala tripeptides.

<sup>d</sup> Type of side chain interaction(s): sol = solvent-exposed; SL = side chain/ligand; SM = side chain/main chain; SS = side chain/side chain. All three roles are given where there is any difference.

<sup>e</sup> Contacts a residue in the partner subunit.

<sup>f</sup> W339 forms a  $\pi$ -cation interaction with K331 N<sup>e</sup>.

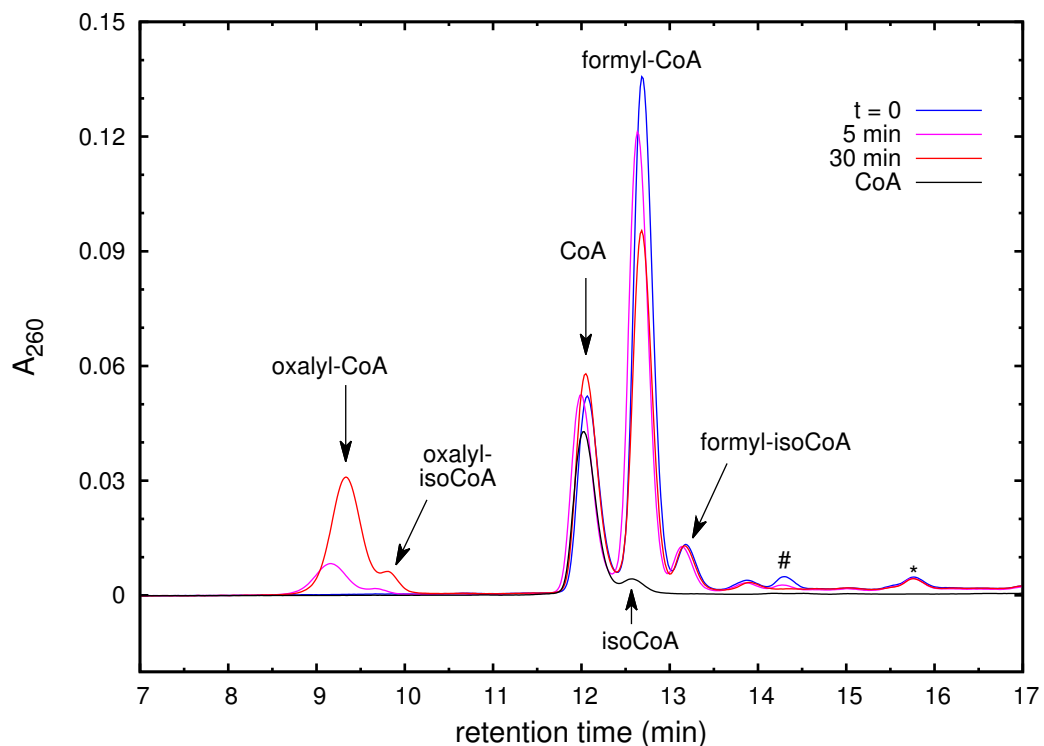

Figure 1: A representative HPLC time series used for FCOCT activity measurements. Indicated (acyl)-CoA peaks were identified by reference to authentic standards, except for oxalyl-(iso)CoA. The peak labeled with an asterisk has the same retention time as acetyl-CoA, which is a potential contaminant. However, acetyl-CoA was not detected in mass spectrometric analysis of the synthetic formyl-CoA, and the unassigned peak remains a constant size throughout the assay. The peak labeled with a pound sign is unassigned and was observed to decrease over time in the absence of enzyme.

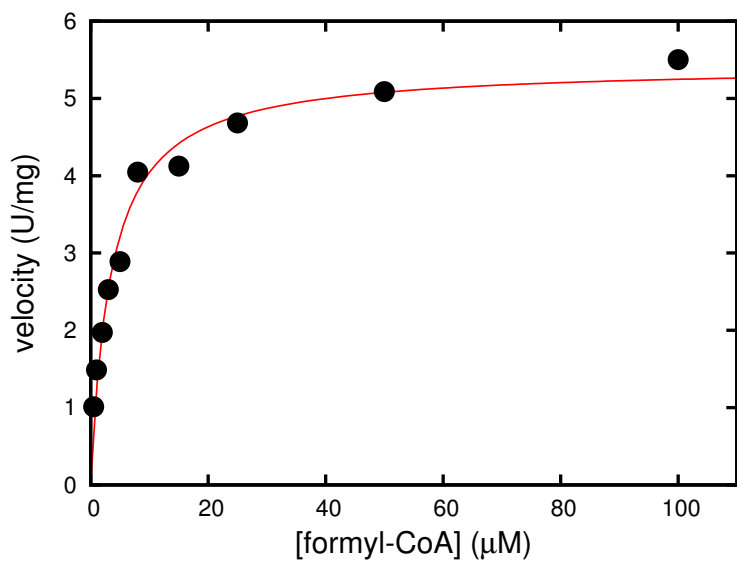

Figure 2: Saturation curve for formyl-CoA determined at 50 mM oxalate with 20 – 100 ng H6UctB.

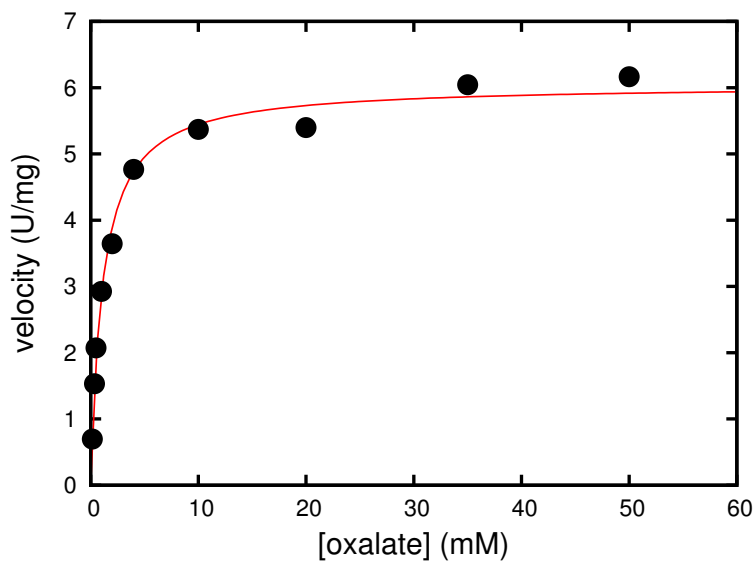

Figure 3: Saturation curve for oxalate determined at 0.1 mM formyl-CoA with 100 ng H6UctB.

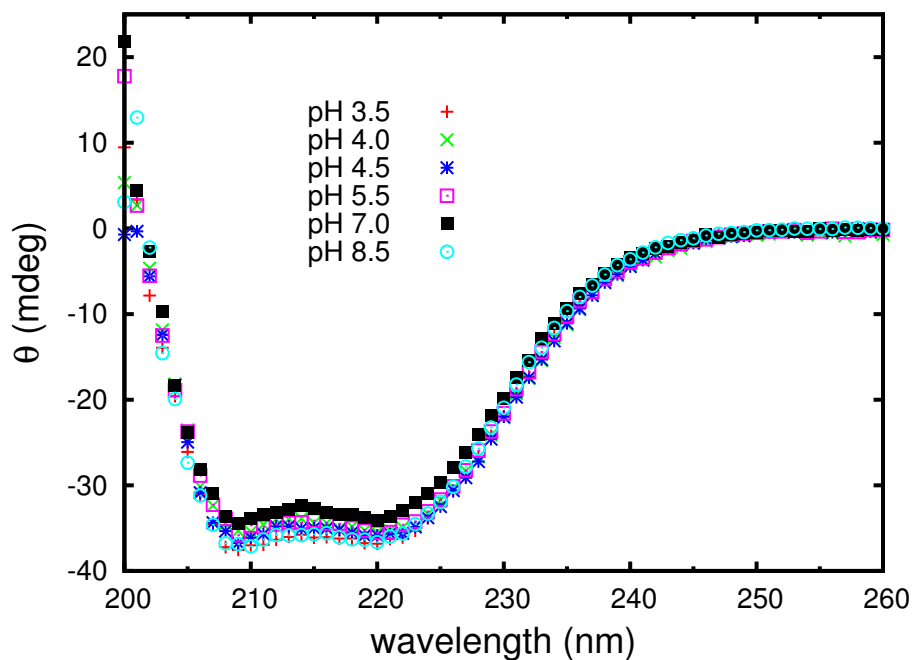

Figure 4: Ultraviolet CD spectra for H6UctB acquired at 20 °C at the indicated pH values.

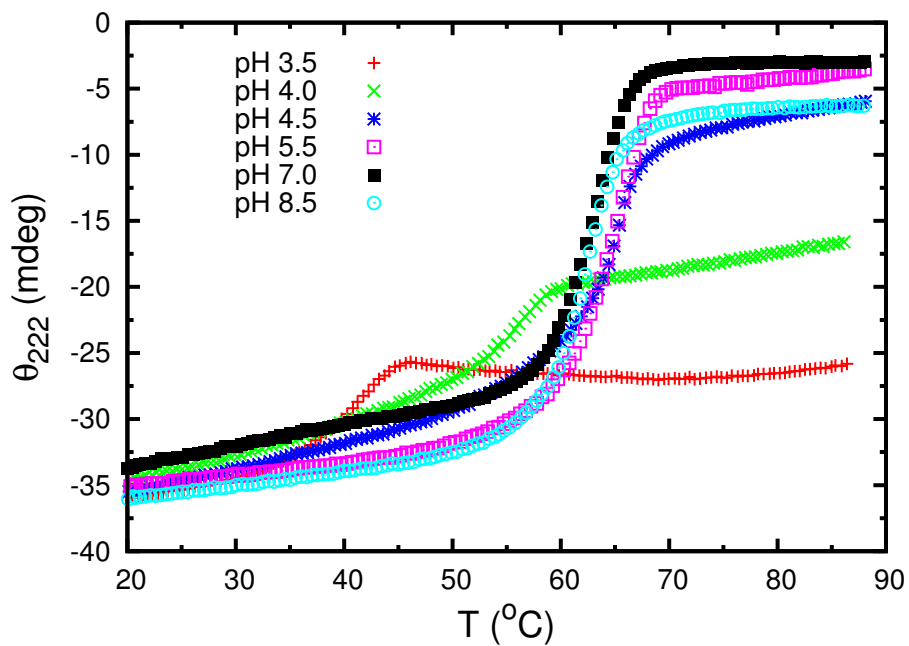

Figure 5: Thermal denaturation profiles used to measure  $T_m$  values for H6UctB.

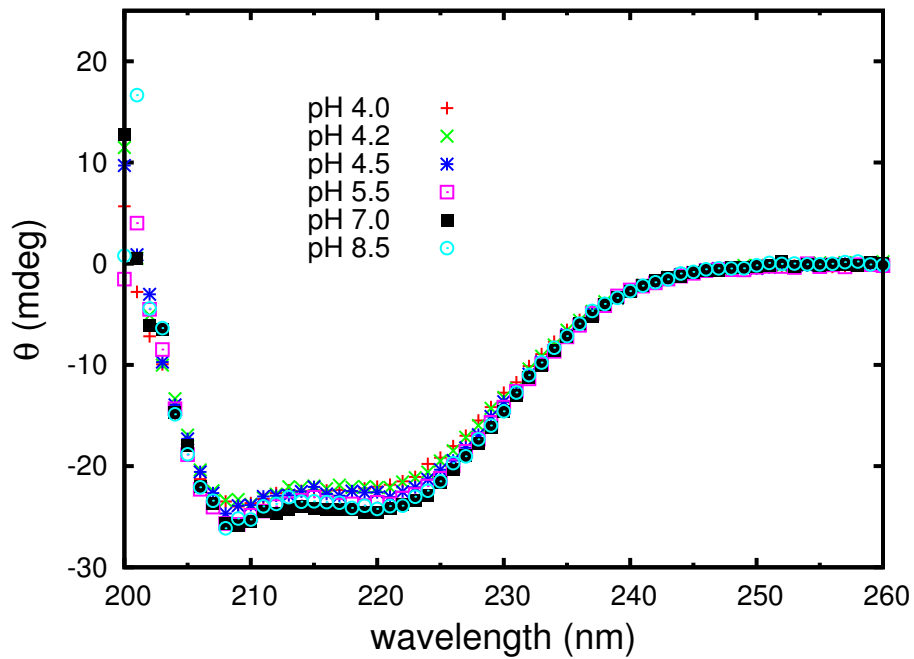

Figure 6: Ultraviolet CD spectra for H6YfdW acquired at 20 °C at the indicated pH values.

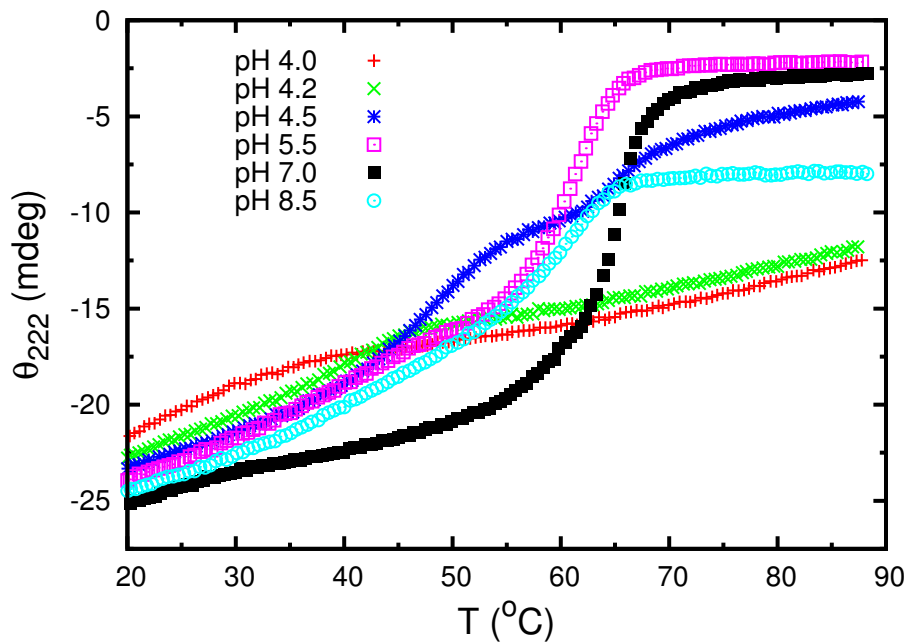

Figure 7: Thermal denaturation profiles used to measure  $T_m$  values for H6YfdW.



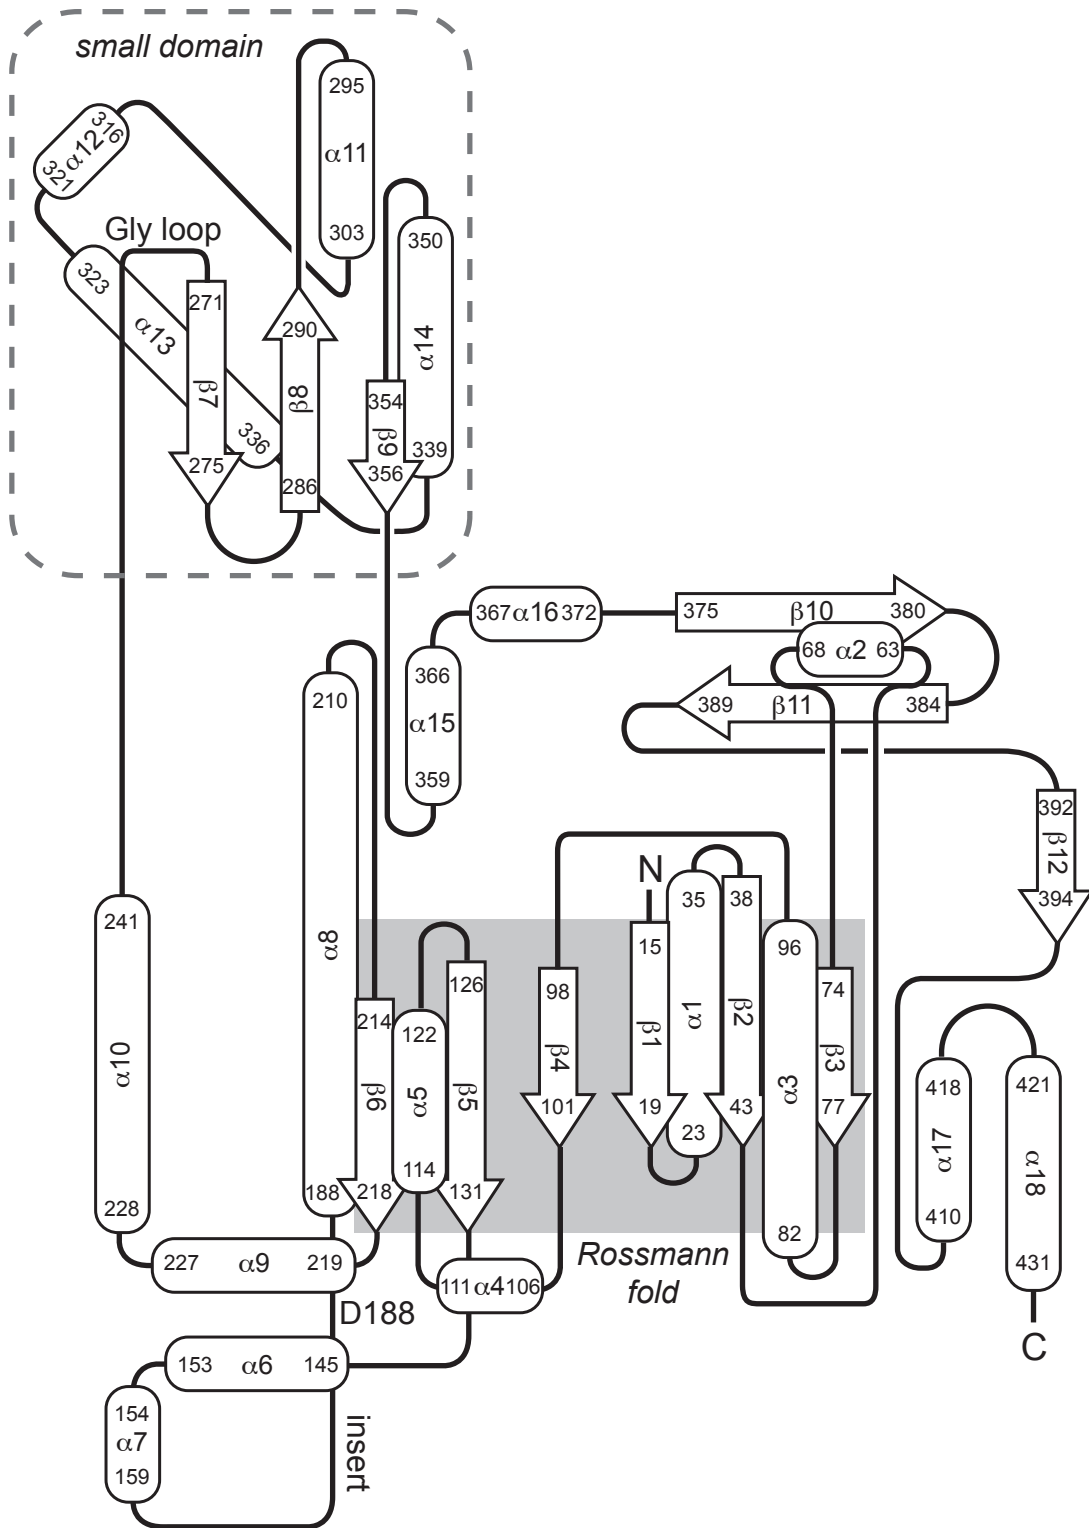

Figure 8: Topology diagram for H6UctB. Strand  $\beta 12$  interacts with strand  $\beta 6$  of the partner subunit.

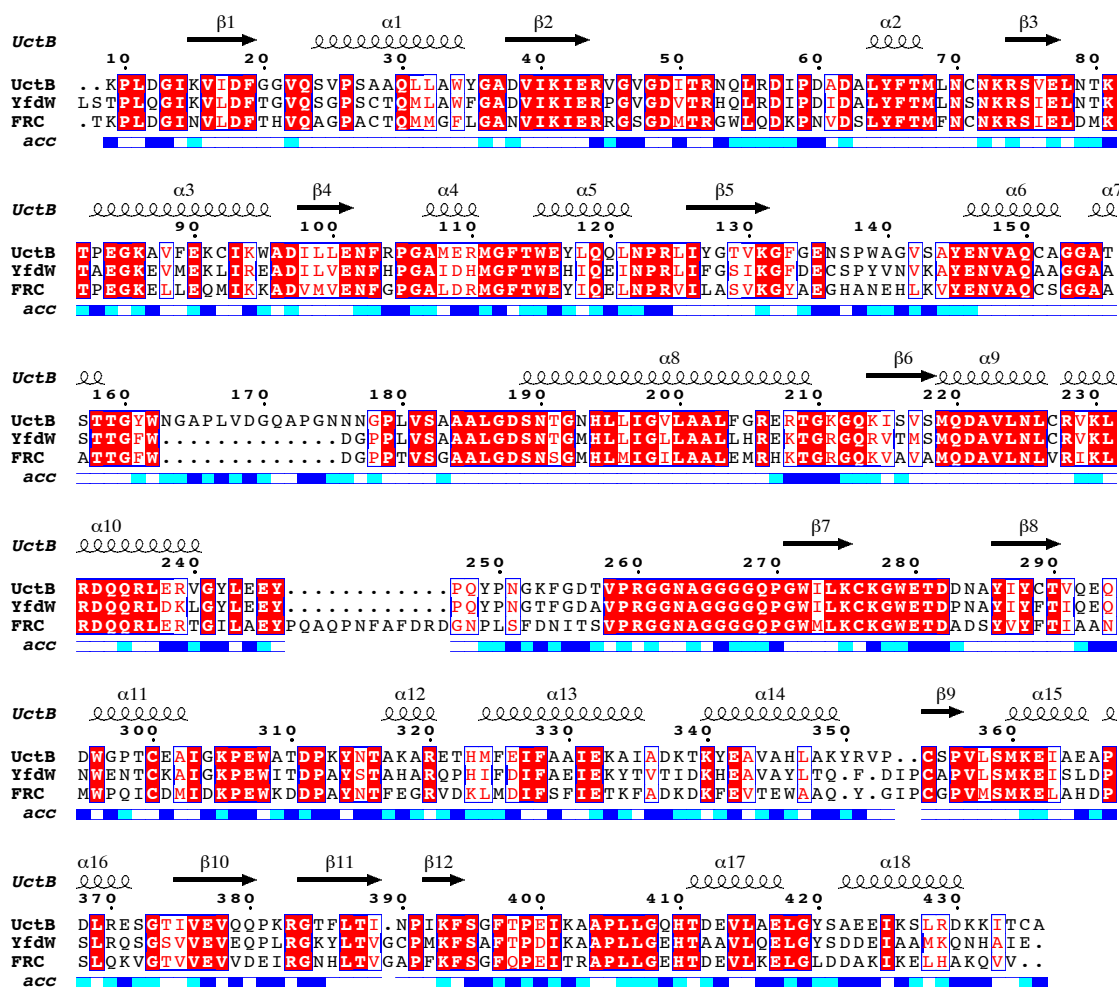

Figure 9: Structure-based sequence alignment of FCOCT enzymes. UctB, *A. acetii* H6UctB (PDB id 3ubm); YfdW, *E. coli* YfdW (PDB id 1q6y); FRC, *O. formigenes* FRC (PDB id 1p5r). The alignment was computed using SSM using subunit A of each structure, all of which are bound to CoA. H6UctB secondary structure assignments (omitting three  $3_{10}$  helices) and relative solvent accessibilities (*acc*) were computed using DSSP implemented within ESPript. Accessible positions ( $acc > 0.4$ ) are dark blue, intermediate positions ( $0.4 > acc > 0.1$ ) are cyan, and buried positions ( $acc < 0.1$ ) are white.

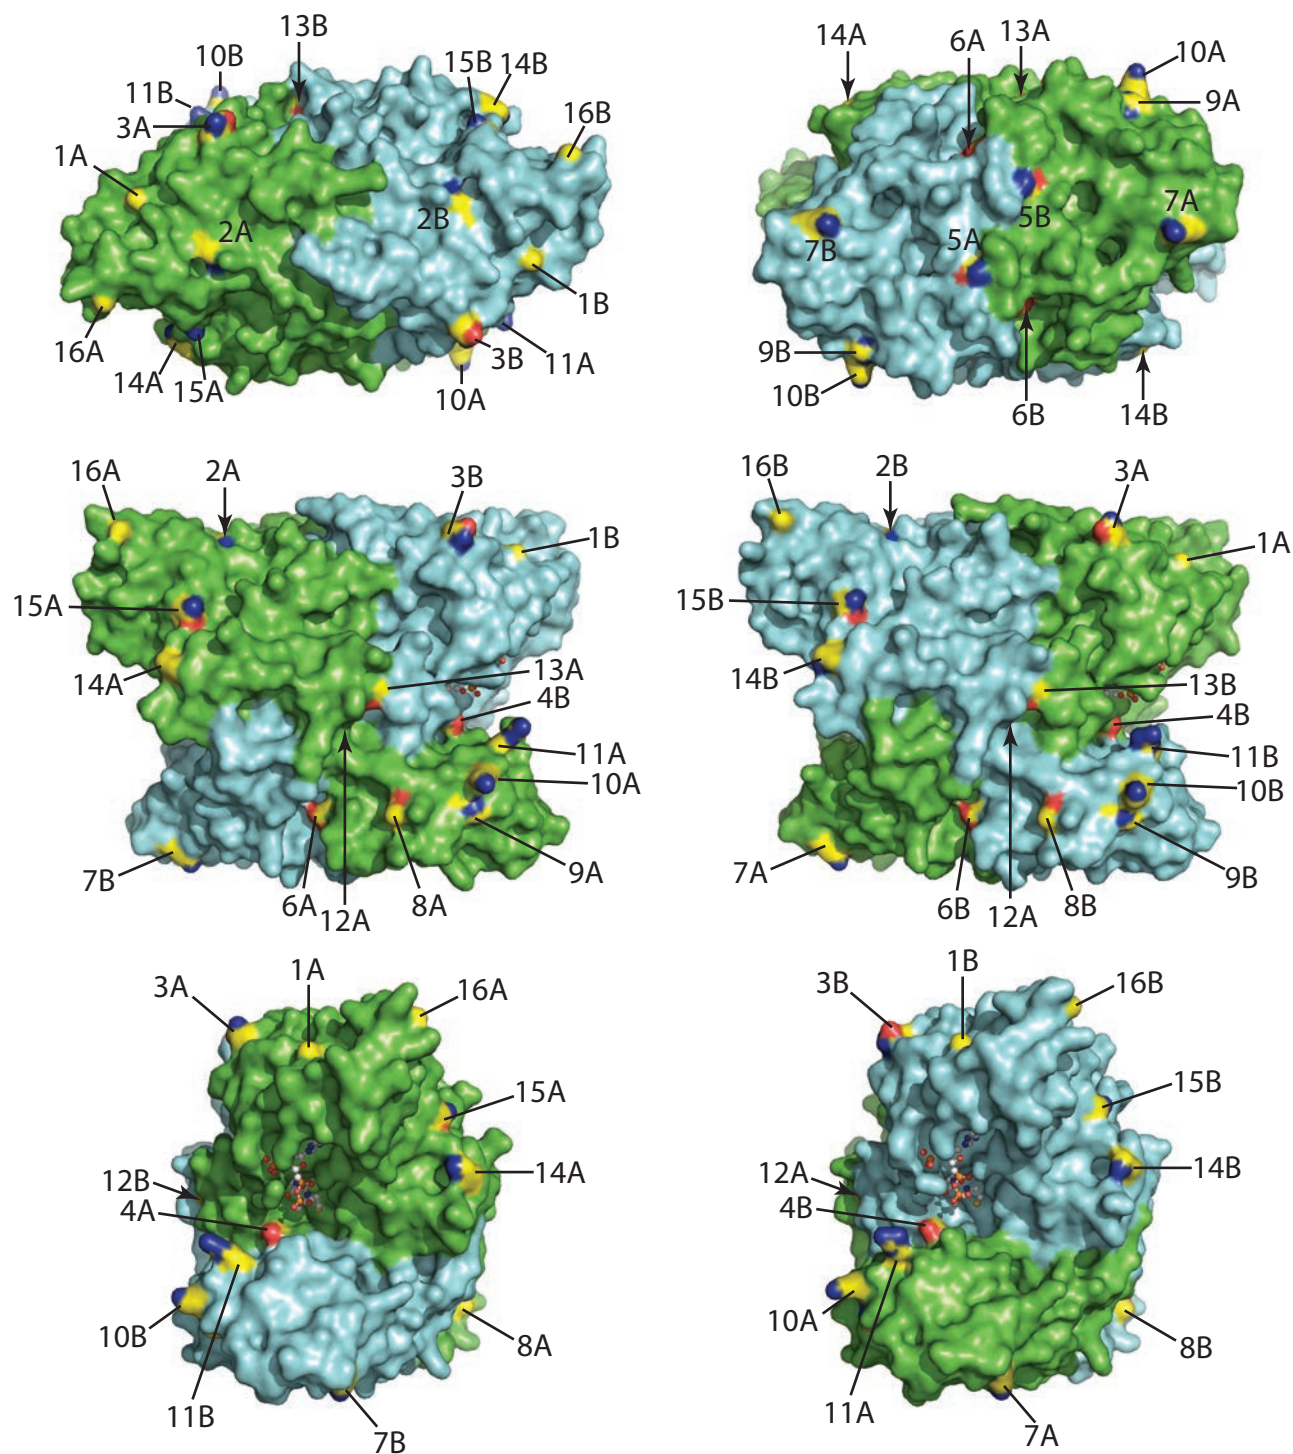

Figure 10: The molecular surface of H6UctB (PDB id 3ubm) colored by chain (chain A, green; chain B, light blue) or by atom for the side chains of residues that alter the surface charge of H6UctB relative to YfdW/FRC. The labels denote entry numbers in Table II and chain (A or B). CoA is rendered as balls and sticks. Rotations on the indicated axis are given relative to the view illustrated in Figure 3B or the left center image. *Top row*, “top” (rotated 90° on  $x$ ) and “bottom” (rotated 270° on  $x$ ). *Middle row*, “front” (no rotation) and “back” (rotated 180° on  $y$ ). *Bottom*, “left side” (rotated 90° on  $y$ ) and “right side” (rotated 270° on  $y$ ).



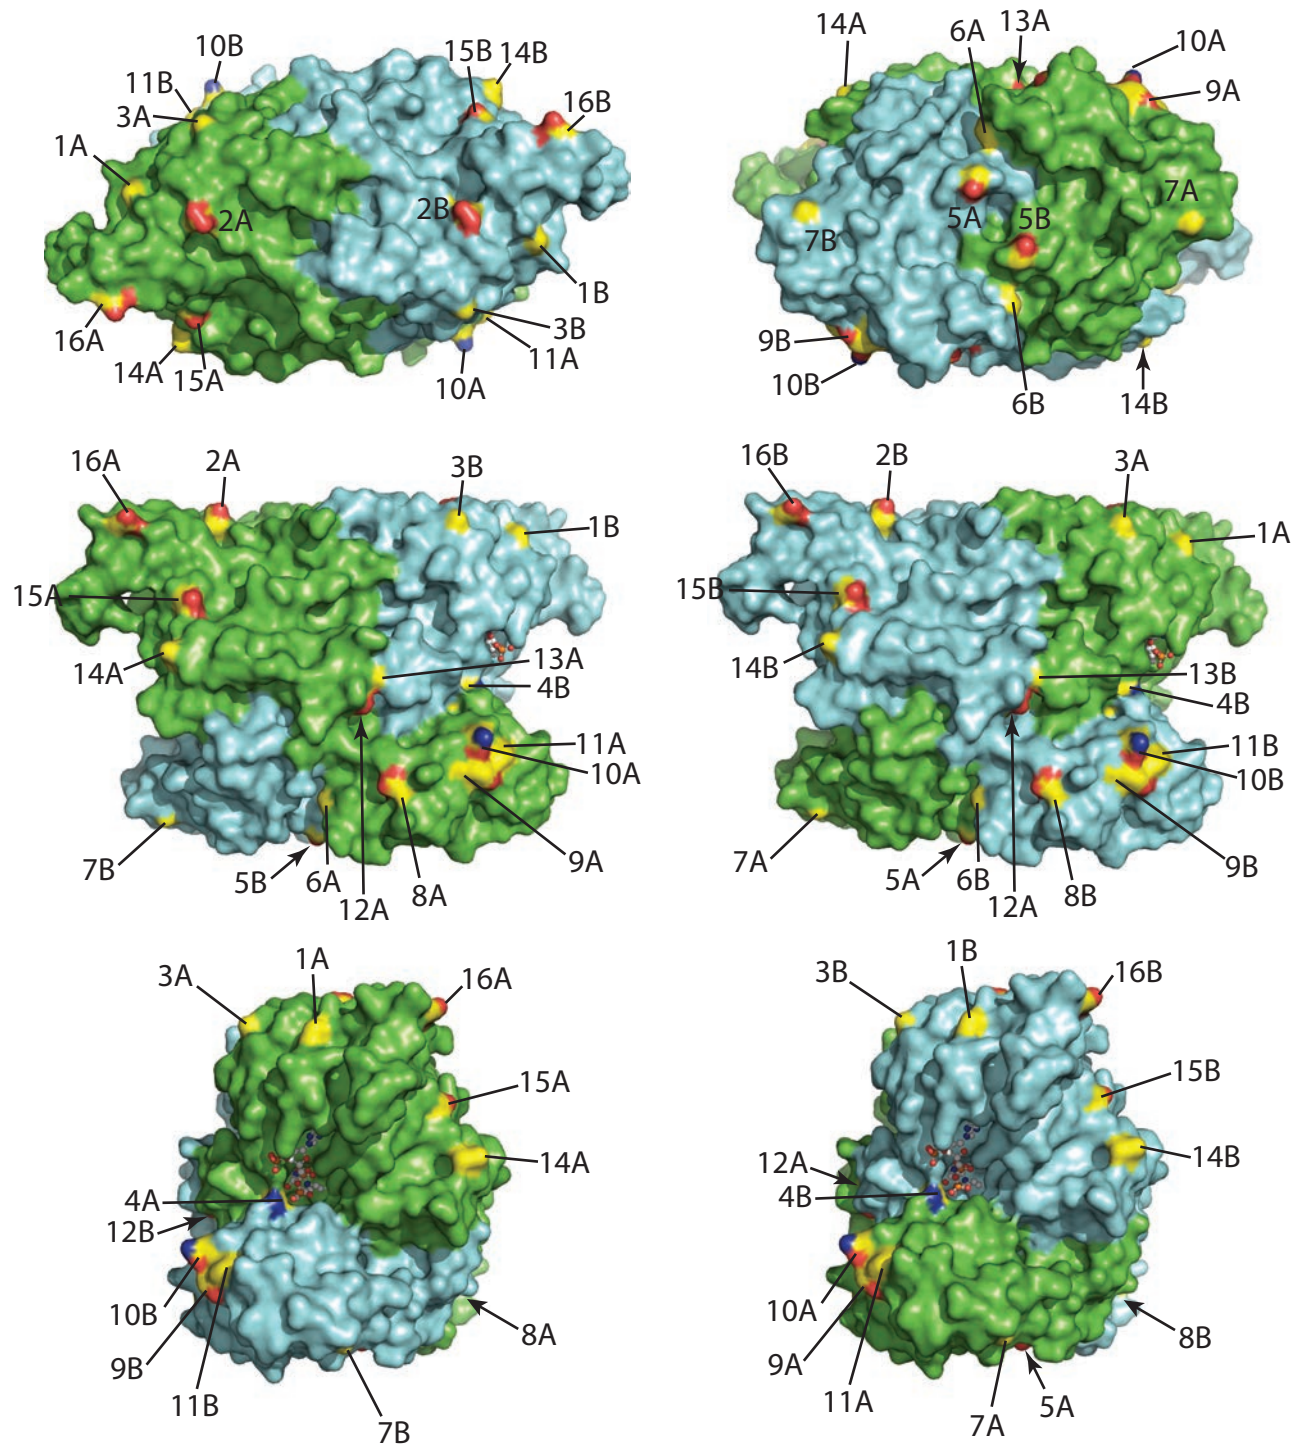

Figure 11: The molecular surface of YfdW (PDB id 1q6y) oriented and rendered as in Supplementary Figure 10. Crystallographic symmetry operators were used to generate the dimeric biological unit from the monomeric asymmetric unit.

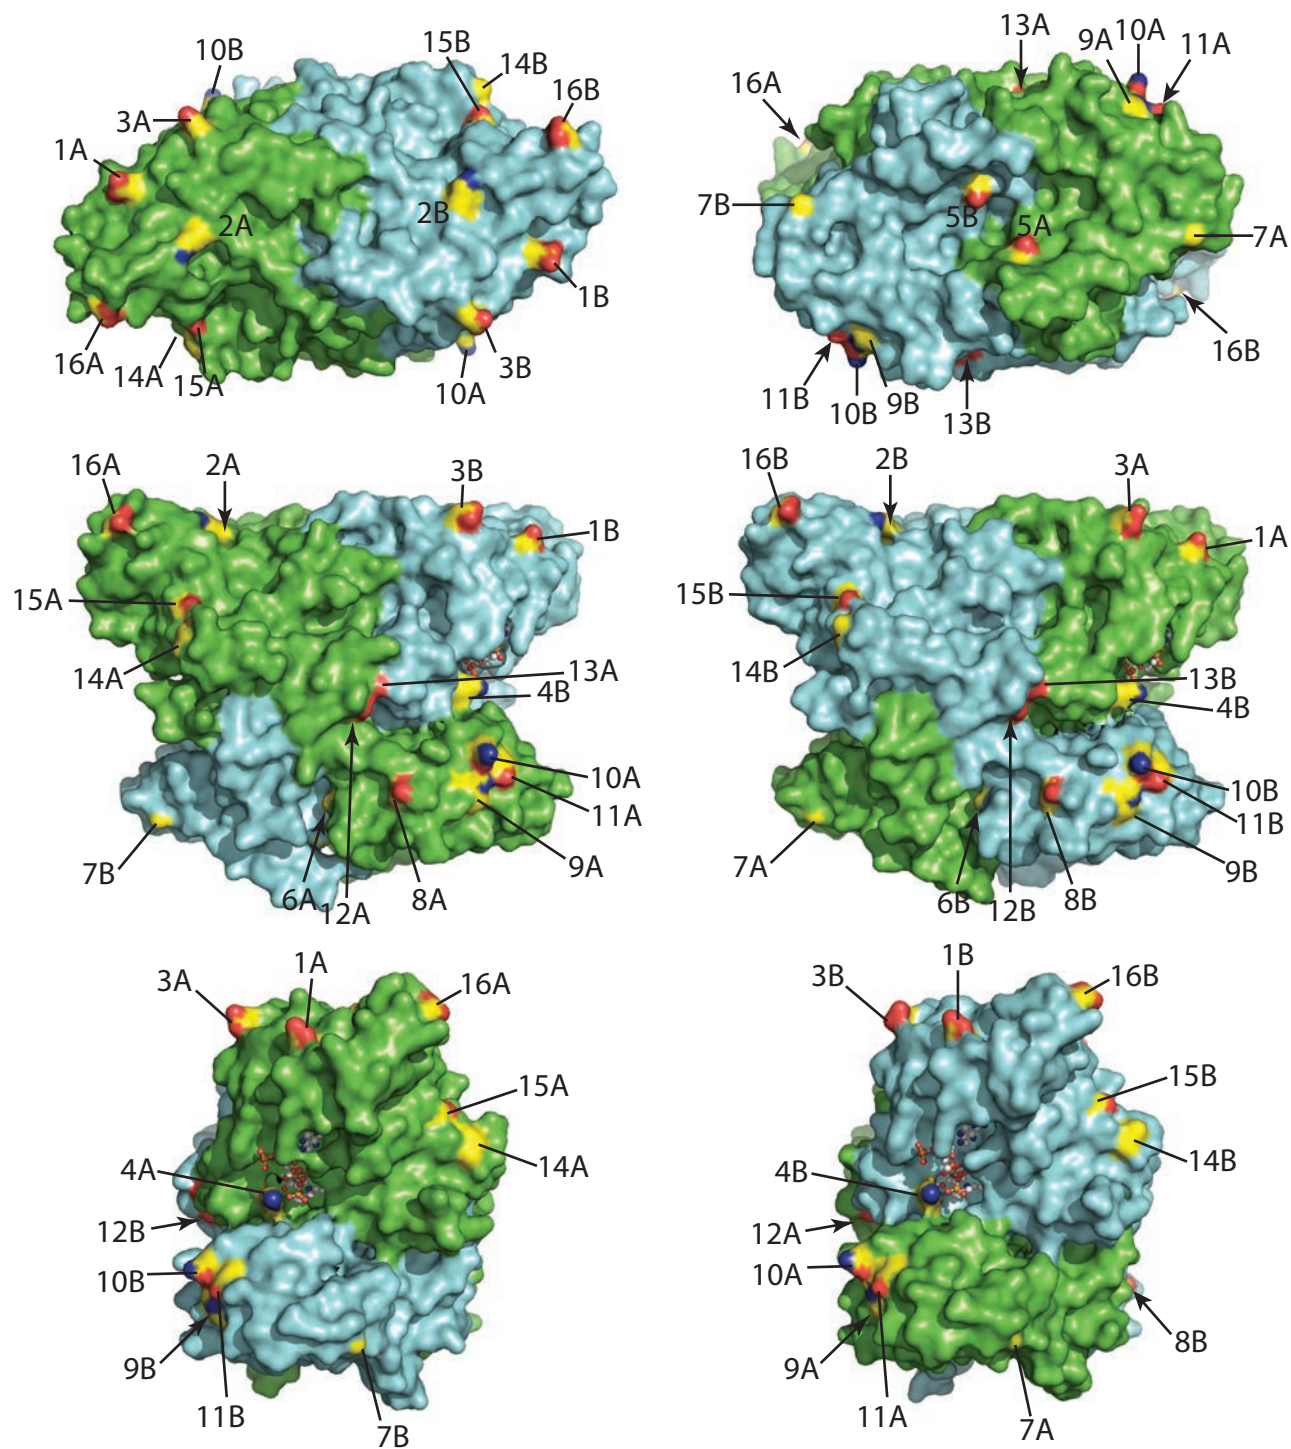

Figure 12: The molecular surface of FRC (PDB id 1p5r) oriented and rendered as in Supplementary Figure 10.



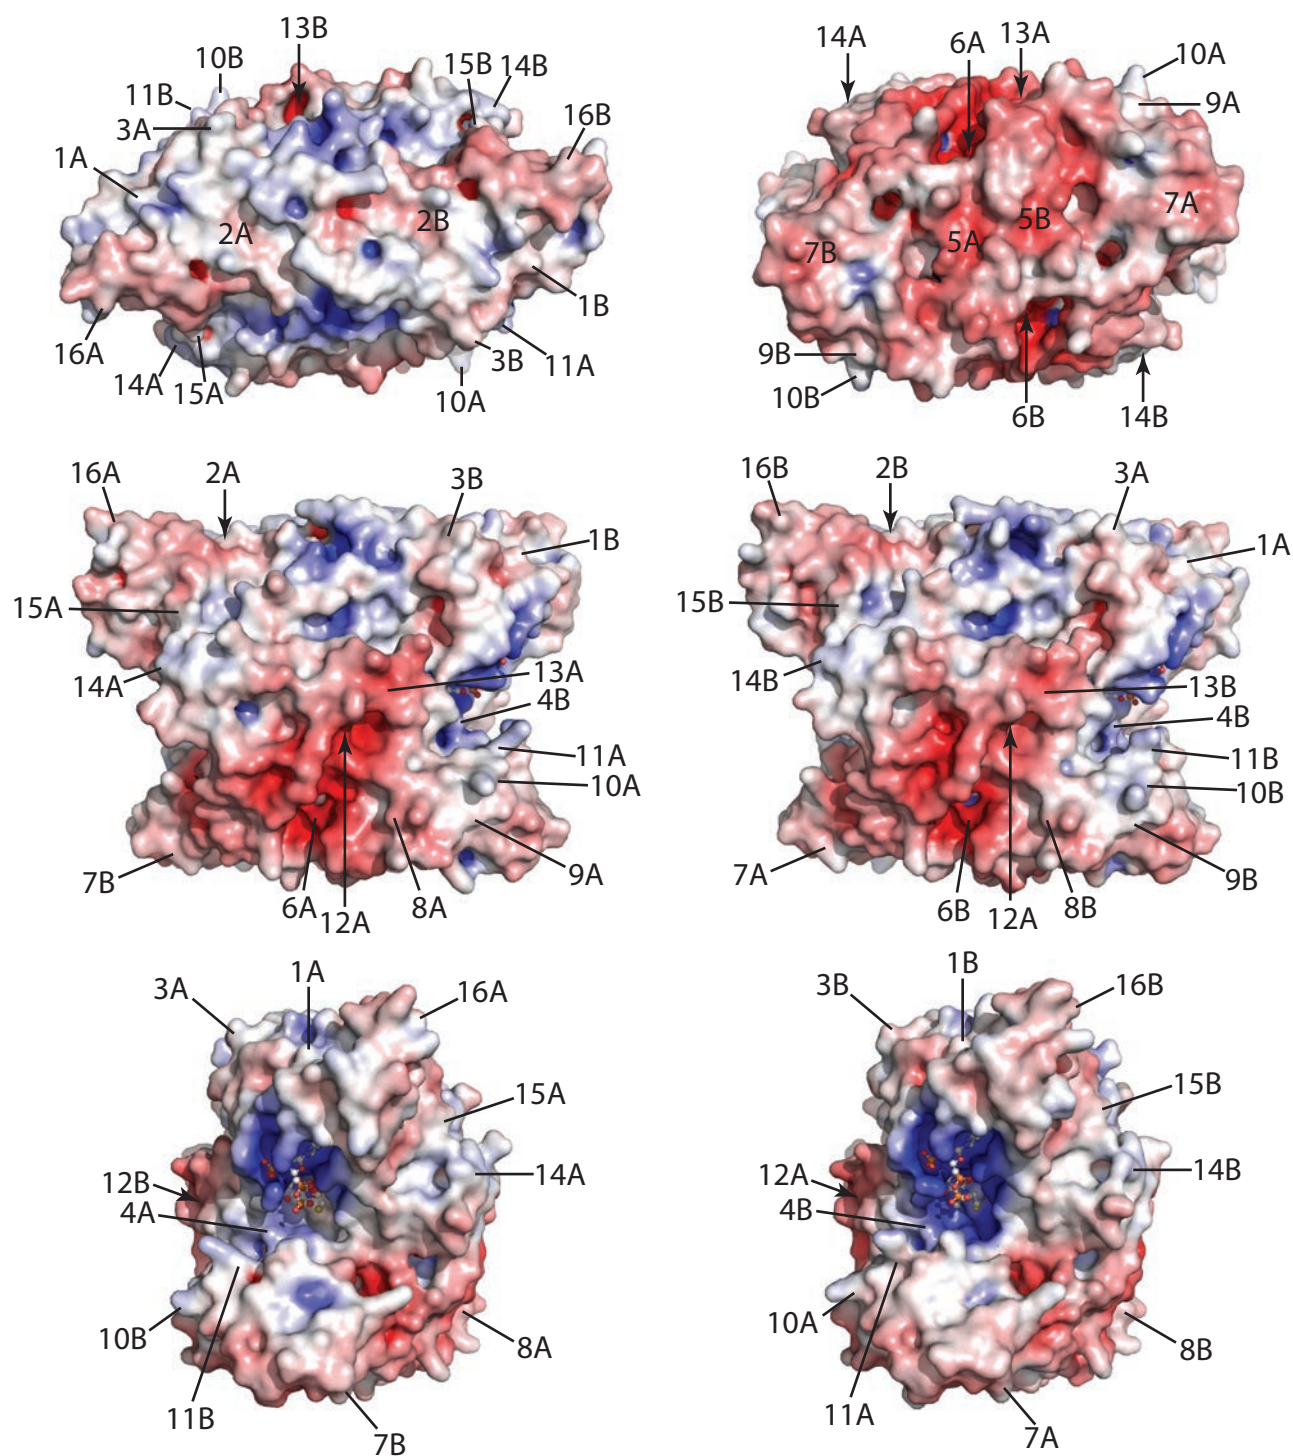

Figure 13: The molecular surface of H6UctB (PDB id 3ubm) colored by electrostatic potential. Negatively and positively charged regions are colored red and blue, respectively. The saturation of the color is proportional to the degree of charge, ranging from  $-8$  to  $+8$  kT/e. The surface is otherwise identical to that in Supplementary Figure 10. The left middle depiction is the same as Figure 3B.

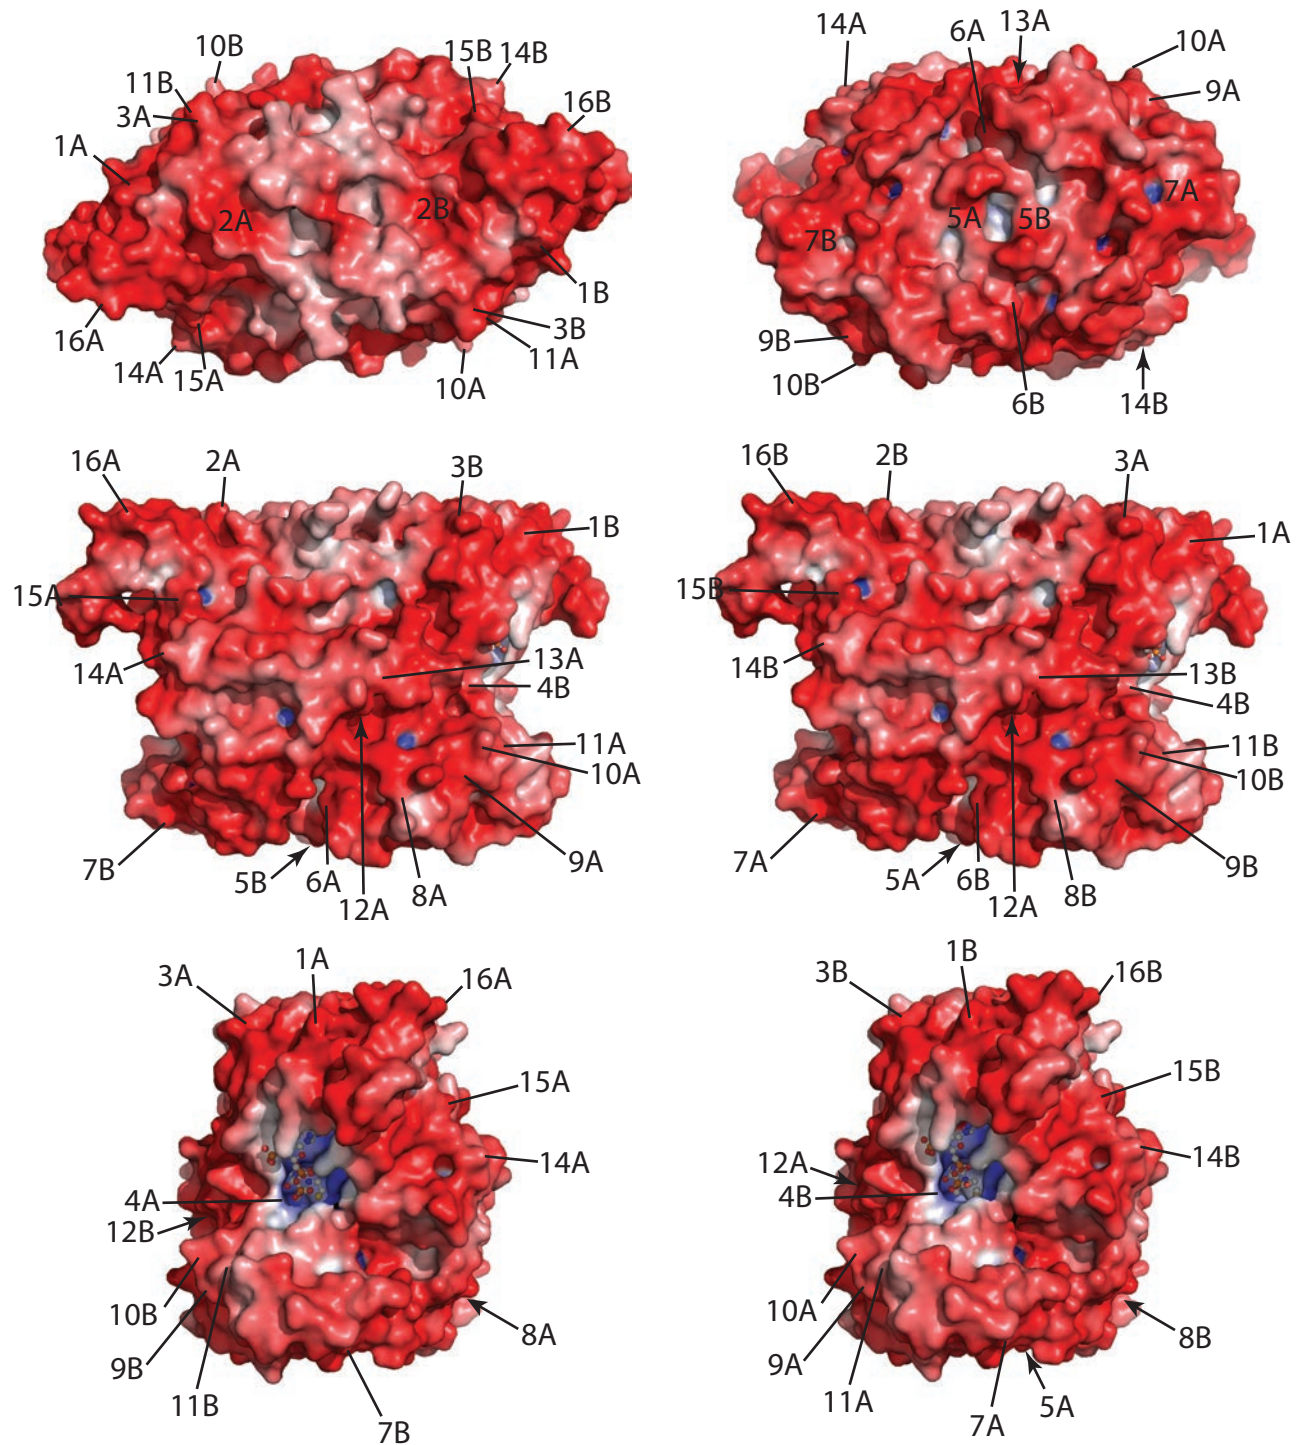

Figure 14: The molecular surface of YfdW (PDB id 1q6y) depicted as in Supplementary Figure 13. Crystallographic symmetry operators were used to generate the dimeric biological unit from the monomeric asymmetric unit.



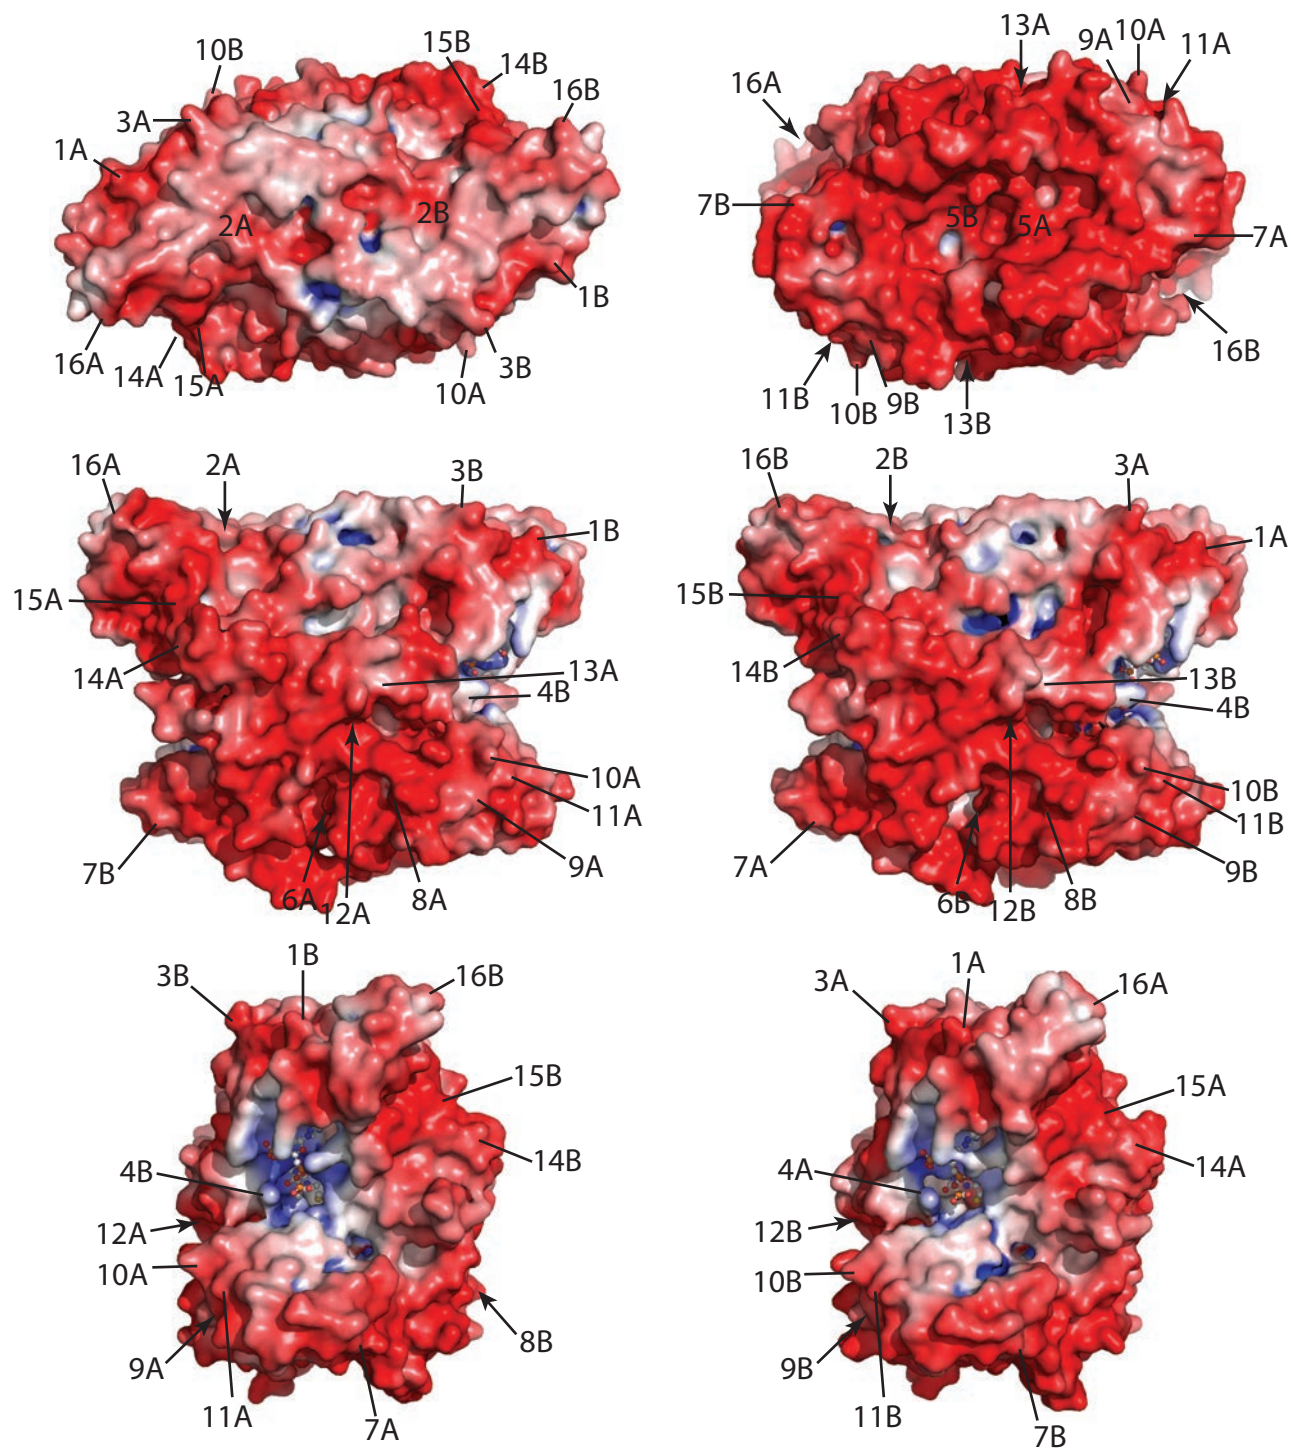

Figure 15: The molecular surface of FRC (PDB id 1p5r) depicted as in Supplementary Figure 13.
